# Supplementary material for: 25-Hydroxycholesterol protects against myocardial ischemia-reperfusion injury via inhibiting PARP activity
Source: PubMed Central journal article supplement (PMC6949155; doi:10.7150/ijbs.35075), 2020-01-01

S1

A

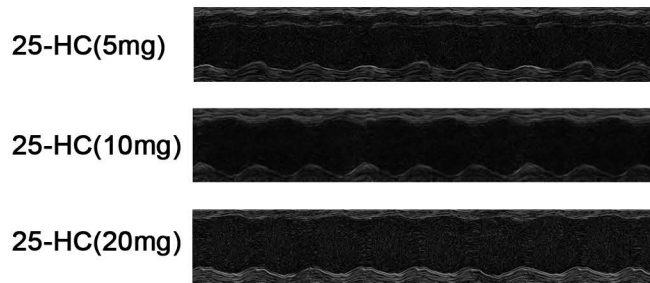

B

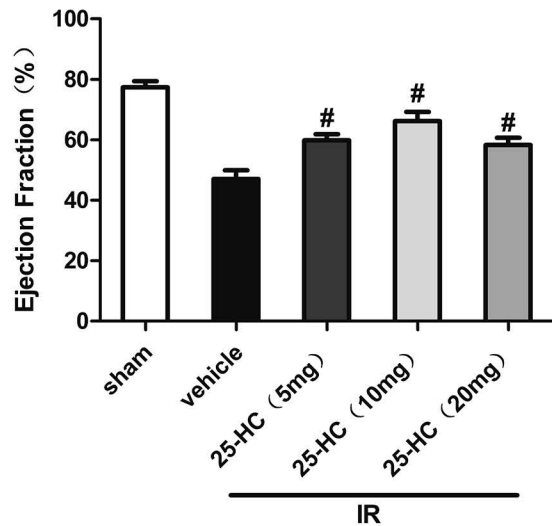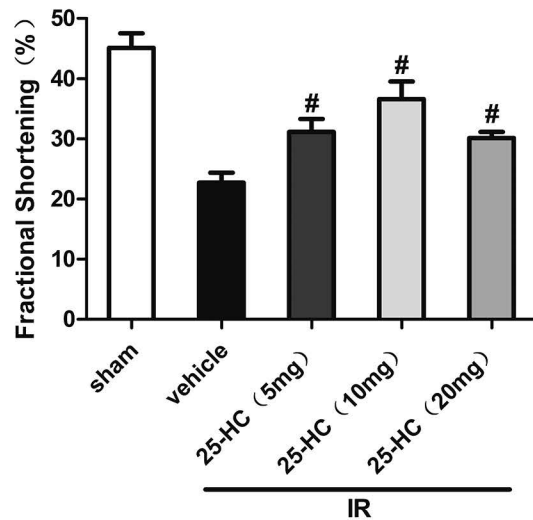

Supplement: ijbsv16p0298s1.pdf [file ijbsv16p0298s1.pdf]
